# Supplementary material
Source: ML conference proceedings conference paper supplement (https://openreview.net/forum?id=4QYPMXcOCp)
Supplement: supplementary_material [file attachment]

# 1 Appendices

## 2 A Training Details and Hyperparameters

### 3 A.1 Continuous Control Experiments

4 **Training details** For reward learning experiments, we used the implementations of Preference  
5 Comparisons Algorithm from Imitation Learning Baseline Implementations [6] with a full list of  
6 hyperparameters in Table 1. For the RL component, we used soft actor-critic (SAC) [3] implementa-  
7 tions from Stable-Baselines3 [5] in the locomotion control tasks with a list of hyperparameters in  
8 Table 2. For retraining evaluations, we use the same hyperparameters for SAC to train new agents  
9 against the frozen learned reward models.

10 **Reward model** The reward model consists of a single multi-layer perceptrons with two  
11 hidden layers of size 256 and LeakyReLU activations with slope 0.01. The input of the  
12 model consists of the state, action and next state vectors, and the input vector is normalized  
13 by running normalization. The output the the reward model is normalized by by exponen-  
14 tial moving average. During relearning experiments, we directly use the raw reward output  
15 from the reward network while being normalized by a VecNormalize layer in Stable-Baselines3  
16 ([https://stable-baselines3.readthedocs.io/en/master/guide/vec\\_envs.html#vecenv](https://stable-baselines3.readthedocs.io/en/master/guide/vec_envs.html#vecenv)).

| Hyperparameter         | Value    |
|------------------------|----------|
| Segment Length         | 50       |
| Total Comparisons      | 2000     |
| Number of Iteration    | 50       |
| Reward Training Epochs | 5        |
| Query Schedule         | constant |

Table 1: Reward learning hyperparameters for continuous control experiments

| Hyperparameter       | Value  |
|----------------------|--------|
| Learning Rate        | 0.0003 |
| Batch Size           | 256    |
| Discount             | 0.99   |
| Learning Starts from | 10000  |

Table 2: SAC hyperparameters for continuous control experiments

### 17 A.2 Tabular Experiments

18 Similarly to the continuous control experiments we use Imitation’s implementation of preference  
19 comparison [6]. However, we use a tabular soft-q learning algorithm with a replay buffer [2] with  
20 reward relabing [4] to solve the environments. The reward network again uses a similar MLP  
21 architecture to the continuous control setting with a slightly smaller hidden size of 32. Finally, we  
22 normalize the reward functions before ensembling them using a simple running norm over sampled  
23 transitions which is frozen during retraining. Hyperparamaters can be found in Table 3.

## 24 B Epic Distance as an Evaluation Metric

25 As an additional evaluation criterion, we considered using EPIC distance [1] to measure the distance  
26 between learned reward functions and the ground-truth reward. EPIC works by canonicalizing  
27 the rewards to be invariant to potential shaping, normalizing them to be invariant to scale, and  
28 then computing the  $L^2$  norm of the difference of those functions over a *coverage* distribution of  
29 transitions. Here we consider two coverage distributions: uniform and expert distribution. The  
30 uniform distribution is uniform over feasible transitions. The expert distribution is the distribution of  
31 a soft-optimal policy with a temperature of 10 to give slightly more coverage.

| Hyper Parameter                                | Value        |
|------------------------------------------------|--------------|
| Sampler Soft-Q Learning                        |              |
| discount                                       | 0.99         |
| learning rate                                  | 5e-2         |
| replay buffer capacity                         | $\infty$     |
| temperature                                    | 0.1          |
| samples from buffer per env sample             | 10           |
| initial soft-q value                           | 200          |
| Reward Learning                                |              |
| trajectory fragment length                     | 30           |
| total comparison budget                        | 2500         |
| rL budget                                      | 500000       |
| frac. of comparisons from initial random trajs | 0.1          |
| select fragments for comparison                | randomly     |
| epochs of training per iteration               | 1            |
| number of iterations                           | 100          |
| query schedule                                 | constant     |
| reward learning rate                           | 1e-3         |
| Reward Network                                 |              |
| reward network hidden layers                   | [32, 32]     |
| activation function                            | ReLU         |
| output normalization                           | Running Norm |

Table 3: Tabular Experiment Hyperparameters

## 32 C Additional Tabular Experiments

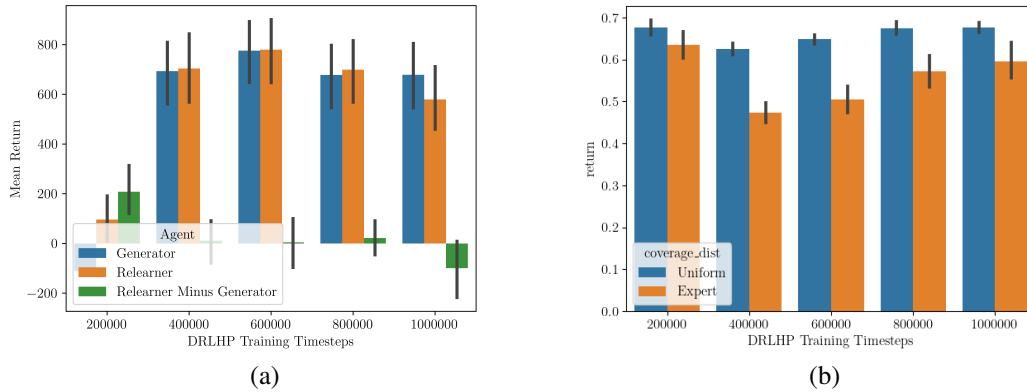

Figure 1: Increasing the number of time steps of R.L. training does not seem to significantly effect relearning failures

33 To study the effects of training the sampler for a more time steps, we first consider a simple  
 34 environment consisting of a 10x10 grid world. The agent begins in the lower left-hand corner of the  
 35 environment and gains a ground-truth reward of 10 for reaching the lower right-hand cell, as seen in  
 36 Figure 2.

37 The performance of the sampler and relearner initially increases with more training timesteps, with  
 38 our relearners generalizing well and achieving slightly higher performance than their respective  
 39 samplers. However, it quickly plateaus even though we *do not* see significant reductions in relearner  
 40 performance with an increased number of time steps. The EPIC distances of our learned reward  
 41 functions from the ground truth reward begin to increase after 400,000 timesteps Figure 1 (b).

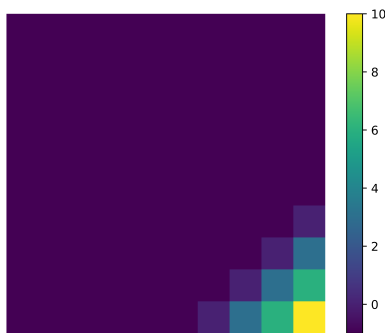

Figure 2: Tiny room environment  
The ground-truth reward in the tiny room environment. Note that the reward only depends on the current state.

While increasing the number of total training timesteps used for DRLHP does seem to degrade the quality of the reward function according to EPIC distance. However, it does not appear to hurt relearning performance in the same way in this simple tabular environment.

## References

- [1] A. Gleave, M. D. Dennis, S. Legg, S. Russell, and J. Leike. Quantifying differences in reward functions. In *International Conference on Learning Representations*, 2021. URL <https://openreview.net/forum?id=LwEQnp6CYev>.
- [2] T. Haarnoja, H. Tang, P. Abbeel, and S. Levine. Reinforcement learning with deep energy-based policies. In D. Precup and Y. W. Teh, editors, *Proceedings of the 34th International Conference on Machine Learning, ICML 2017, Sydney, NSW, Australia, 6-11 August 2017*, volume 70 of *Proceedings of Machine Learning Research*, pages 1352–1361. PMLR, 2017. URL <http://proceedings.mlr.press/v70/haarnoja17a.html>.
- [3] T. Haarnoja, A. Zhou, K. Hartikainen, G. Tucker, S. Ha, J. Tan, V. Kumar, H. Zhu, A. Gupta, P. Abbeel, and S. Levine. Soft actor-critic algorithms and applications. Technical report, 2018.
- [4] K. Lee, L. M. Smith, and P. Abbeel. PEBBLE: feedback-efficient interactive reinforcement learning via relabeling experience and unsupervised pre-training. In M. Meila and T. Zhang, editors, *Proceedings of the 38th International Conference on Machine Learning, ICML 2021, 18-24 July 2021, Virtual Event*, volume 139 of *Proceedings of Machine Learning Research*, pages 6152–6163. PMLR, 2021. URL <http://proceedings.mlr.press/v139/lee21i.html>.
- [5] A. Raffin, A. Hill, A. Gleave, A. Kanervisto, M. Ernestus, and N. Dormann. Stable-baselines3: Reliable reinforcement learning implementations. *Journal of Machine Learning Research*, 22 (268):1–8, 2021. URL <http://jmlr.org/papers/v22/20-1364.html>.
- [6] S. Wang, S. Toyer, A. Gleave, and S. Emmons. The imitation library for imitation learning and inverse reinforcement learning. <https://github.com/HumanCompatibleAI/imitation>, 2020.
